# Supplementary material for: Identifying Differentially Expressed Genes of Zero Inflated Single Cell RNA Sequencing Data Using Mixed Model Score Tests
Source: Front Genet. 2021 Feb 5;12:616686. doi: 10.3389/fgene.2021.616686 (PMC7894898; doi:10.3389/fgene.2021.616686)
Supplement: Supplementary file 4 [file Table_1.XLSX]

## Sheet: Table S1
Table S1. False positive rate control of twelve differential expression methods with median per-comparison error rates and interquartile ranges (in parentheses) for 30 simulated null datasets
Datasets	μπ	θ	Poisson	TrPois	ZiPois	NB	TrNB	NB-zinbwave	DESeq2	DESeq2-zinbwave	edgeR	edgeR-zinbwave	limma-voom	MAST
Usoskin	-	-	0.1375(0.0273)	0.0373(0.0079)	0.0388(0.0070)	0.0282(0.0089)	0.3090(0.0319)	0.0596(0.0145)	0.0640(0.0131)	0.0477(0.0190)	0.0691(0.0131)	0.0664(0.0090)	0.0370(0.0099)	0.0485(0.0597)
Tung	-	-	0.0825(0.0049)	0.0484(0.0050)	0.0487(0.0046)	0.0065(0.0011)	0.0518(0.0061)	0.0259(0.0021)	0.0431(0.0030)	0.0151(0.0016)	0.0572(0.0036)	0.0450(0.0035)	0.0448(0.0050)	0.0361(0.0054)
NB	1	0.5	0.0560(0.0033)	0.0184(0.0042)	0.0184(0.0042)	0.0068(0.0036)	0.1982(0.0050)	0.0324(0.0027)	0.0170(0.0032)	0.0450(0.0030)	0.0184(0.0034)	0.0440(0.0025)	0.0503(0.0026)	0.0334(0.0222)
NB	1	1	0.0481(0.0028)	0.0178(0.0043)	0.0178(0.0043)	0.0010(0.0007)	0.0932(0.0035)	0.0250(0.0017)	0.0055(0.0011)	0.0495(0.0019)	0.0064(0.0022)	0.0497(0.0028)	0.0506(0.0019)	0.0183(0.0236)
NB	1	2	0.0452(0.0033)	0.0159(0.0039)	0.0159(0.0039)	0.0000(0.0001)	0.0498(0.0032)	0.0236(0.0044)	0.0009(0.0005)	0.0500(0.0022)	0.0012(0.0009)	0.0498(0.0030)	0.0513(0.0019)	0.0156(0.0014)
Poisson	1	∞	0.0402(0.0023)	0.0276(0.0125)	0.0276(0.0125)	0.0000(0.0000)	0.0038(0.0058)	0.0204(0.0164)	0.0000(0.0000)	0.0400(0.0015)	0.0000(0.0000)	0.0460(0.0022)	0.0520(0.0043)	0.0136(0.0089)
NB	0	0.5	0.0598(0.0040)	0.0100(0.0041)	0.0100(0.0041)	0.0022(0.0012)	0.2291(0.0117)	0.0280(0.0041)	0.0093(0.0020)	0.0467(0.0036)	0.0119(0.0028)	0.0458(0.0037)	0.0494(0.0029)	0.0276(0.0186)
NB	0	1	0.0490(0.0034)	0.0080(0.0022)	0.0080(0.0022)	0.0001(0.0001)	0.1004(0.0075)	0.0206(0.0026)	0.0017(0.0007)	0.0502(0.0044)	0.0034(0.0012)	0.0494(0.0039)	0.0502(0.0025)	0.0174(0.0219)
NB	0	2	0.0428(0.0035)	0.0075(0.0026)	0.0075(0.0026)	0.0000(0.0000)	0.0513(0.0027)	0.0195(0.0028)	0.0002(0.0001)	0.0508(0.0021)	0.0005(0.0004)	0.0504(0.0021)	0.0503(0.0024)	0.0161(0.0025)
Poisson	0	∞	0.0358(0.0070)	0.0138(0.0100)	0.0138(0.0100)	0.0000(0.0000)	0.0050(0.0079)	0.0159(0.0020)	0.0000(0.0000)	0.0374(0.0022)	0.0000(0.0000)	0.0436(0.0027)	0.0498(0.0034)	0.0157(0.0051)
NB	-1	0.5	0.0685(0.0118)	0.0061(0.0016)	0.0061(0.0016)	0.0009(0.0005)	0.2938(0.0380)	0.0217(0.0025)	0.0066(0.0031)	0.0468(0.0032)	0.0117(0.0067)	0.0461(0.0033)	0.0462(0.0032)	0.0052(0.0110)
NB	-1	1	0.0529(0.0044)	0.0045(0.0013)	0.0045(0.0013)	0.0000(0.0001)	0.1276(0.0197)	0.0164(0.0021)	0.0011(0.0009)	0.0494(0.0044)	0.0036(0.0022)	0.0503(0.0036)	0.0464(0.0022)	0.0144(0.0088)
NB	-1	2	0.0458(0.0046)	0.0034(0.0015)	0.0034(0.0015)	0.0000(0.0000)	0.0598(0.0079)	0.0156(0.0023)	0.0001(0.0002)	0.0503(0.0015)	0.0009(0.0008)	0.0506(0.0025)	0.0461(0.0035)	0.0158(0.0034)
Poisson	-1	∞	0.0346(0.0092)	0.0038(0.0030)	0.0038(0.0030)	0.0000(0.0000)	0.0098(0.0071)	0.0107(0.0009)	0.0000(0.0000)	0.0338(0.0073)	0.0001(0.0002)	0.0446(0.0036)	0.0463(0.0039)	0.0102(0.0123)
